# Supplementary material for: Payments From Pharmaceutical Companies to Authors Involved in the Valsartan Scandal in Japan
Source: PubMed Central journal article supplement (PMC6537813; doi:10.1001/jamanetworkopen.2019.3817), 2019-05-17
Supplement: jamanetwopen-2-e193817-s001.pdf [file jamanetwopen-2-e193817-s001.pdf]

## Supplementary Online Content

Sawano T, Ozaki A, Saito H, Shimada Y, Tanimoto T. Payments from pharmaceutical companies to authors involved in the valsartan scandal in Japan. *JAMA Netw Open*. 2019;2(5):e193817. doi:10.1001/jamanetworkopen.2019.3817

**eTable.** 78 Pharmaceutical Companies and Their Period of Aggregating the Payments

This supplementary material has been provided by the authors to give readers additional information about their work.

**eTable. 78 Pharmaceutical Companies and Their Period of Aggregating the Payments**

| Pharmaceutical company                | Period of the payment data in 2016 |                    |
|---------------------------------------|------------------------------------|--------------------|
|                                       | Starting date                      | Ending date        |
| Maruho Co., Ltd.,                     | October 1, 2016                    | September 30, 2017 |
| Shire Japan KK,                       | January 1, 2016                    | December 31, 2016  |
| Fuso Pharmaceutical Industries, Ltd., | April 1, 2016                      | March 31, 2017     |
| POLA-Pharma.,                         | January 1, 2016                    | December 31, 2016  |
| Nippon Zoki Pharmaceutical Co., Ltd., | April 1, 2016                      | March 31, 2017     |
| Nippon Kayaku Co., Ltd.               | April 1, 2016                      | March 31, 2017     |
| Kowa Company. Ltd.,                   | April 1, 2016                      | March 31, 2017     |
| Kracle Holdings, Ltd.,                | January 1, 2016                    | December 31, 2016  |
| Fujimoto Pharmaceutical Corporation,  | July 1, 2016                       | June 30, 2017      |
| Kyoto Pharmaceutical Industries, Ltd. | June 1, 2016                       | May 31, 2017       |
| Merck Serono Co., Ltd.,               | January 1, 2016                    | December 31, 2016  |
| Nippon Chemiphar Co., Ltd.,           | January 1, 2016                    | December 31, 2016  |
| TOYAMA CHEMICAL CO., LTD.,            | April 1, 2016                      | March 31, 2017     |
| Bayer Yakuhin, Ltd.,                  | January 1, 2016                    | December 31, 2016  |
| UCB Japan Co., Ltd.,                  | January 1, 2016                    | December 31, 2016  |
| AYUMI Pharmaceutical Corporation,     | April 1, 2016                      | March 31, 2017     |
| CELGENE CORPORATION,                  | January 1, 2016                    | December 31, 2016  |
| Senju Pharmaceutical Co., Ltd.        | April 1, 2016                      | March 31, 2017     |
| Bristol-Myers Squibb K.K.,            | April 1, 2016                      | March 31, 2017     |
| TOA EIYO LTD,                         | April 1, 2016                      | March 31, 2017     |
| TSUMURA & CO.,                        | April 1, 2016                      | March 31, 2017     |
| Toray Industries, Inc.,               | April 1, 2016                      | March 31, 2017     |
| TERUMO CORPORATION,                   | April 1, 2016                      | March 31, 2017     |
| SEIKAGAKU CORPORATION,                | April 1, 2016                      | March 31, 2017     |
| Teikoku Seiyaku Co., Ltd.,            | January 1, 2016                    | December 31, 2016  |
| ASAHI KASEI PHARMA CORPORATION,       | April 1, 2016                      | March 31, 2017     |
| Wakamoto Pharmaceutical Co., Ltd.,    | April 1, 2016                      | March 31, 2017     |
| MOCHIDA PHARMACEUTICAL CO., LTD.,     | April 1, 2016                      | March 31, 2017     |
| Santen Pharmaceutical Co., Ltd.,      | April 1, 2016                      | March 31, 2017     |

| Pharmaceutical company                     | Period of the payment data in 2016 |                   |
|--------------------------------------------|------------------------------------|-------------------|
| Mylan Seiyaku Ltd.,                        | January 1, 2016                    | December 31, 2016 |
| Yakult Honsha Company, Limited.,           | April 1, 2016                      | March 31, 2017    |
| Minophagen Pharmaceutical Co.,             | April 1, 2016                      | March 31, 2017    |
| Taisho Pharmaceutical Co., Ltd.,           | April 1, 2016                      | March 31, 2017    |
| ASKA Pharmaceutical Co., Ltd.              | April 1, 2016                      | March 31, 2017    |
| Meiji Seika Pharma Co., Ltd.,              | April 1, 2016                      | March 31, 2017    |
| NIHON PHARMACEUTICAL CO., LTD.,            | April 1, 2016                      | March 31, 2017    |
| Maruishi Pharmaceutical Co., Ltd.,         | April 1, 2016                      | March 31, 2017    |
| KYORIN Pharmaceutical Co., Ltd.,           | April 1, 2016                      | March 31, 2017    |
| TEIJIN PHARMA LIMITED.,                    | April 1, 2016                      | March 31, 2017    |
| ZERIA Pharmaceutical Co., Ltd.,            | April 1, 2016                      | March 31, 2017    |
| SANWA KAGAKU KENKYUSHO CO., LTD.,          | April 1, 2016                      | March 31, 2017    |
| Kaken Pharmaceutical Co., Ltd.,            | April 1, 2016                      | March 31, 2017    |
| Hisamitsu Pharmaceutical Co., Inc.,        | March 1, 2016                      | February 28, 2017 |
| Sanofi K.K.,                               | January 1, 2016                    | December 31, 2016 |
| EA Pharma Co., Ltd.,                       | April 1, 2016                      | March 31, 2017    |
| Nippon Boehringer Ingelheim Co., Ltd.,     | January 1, 2016                    | December 31, 2016 |
| Torii Pharmaceutical Co., Ltd.,            | January 1, 2016                    | December 31, 2016 |
| AstraZeneca K.K.,                          | January 1, 2016                    | December 31, 2016 |
| Sumitomo Dainippon Pharma Co., Ltd.,       | April 1, 2016                      | March 31, 2017    |
| Novartis Pharma K.K.,                      | January 1, 2016                    | December 31, 2016 |
| Eli Lilly Japan K.K.,                      | January 1, 2016                    | December 31, 2016 |
| ONO PHARMACEUTICAL CO., LTD.,              | April 1, 2016                      | March 31, 2017    |
| Kissei Pharmaceutical Co., Ltd.,           | April 1, 2016                      | March 31, 2017    |
| Eisai Co., Ltd.,                           | January 1, 2016                    | December 31, 2016 |
| NIPPON SHINYAKU CO., LTD.,                 | April 1, 2016                      | March 31, 2017    |
| AbbVie GK,                                 | January 1, 2016                    | December 31, 2016 |
| Mitsubishi Tanabe Pharma Corporation,      | April 1, 2016                      | March 31, 2017    |
| Research Institute for Microbial Diseases, | April 1, 2016                      | March 31, 2017    |
| MSD K.K.,                                  | January 1, 2016                    | December 31, 2016 |
| Janssen Pharmaceutical K.K.,               | January 1, 2016                    | December 31, 2016 |
| Kyowa Hakko Kirin Company, Limited,        | January 1, 2016                    | December 31, 2016 |
| Takeda Pharmaceutical Company Limited.,    | April 1, 2016                      | March 31, 2017    |

| Pharmaceutical company                 | Period of the payment data in 2016 |                   |
|----------------------------------------|------------------------------------|-------------------|
| TAIHO PHARMACEUTICAL CO., LTD.,        | January 1, 2016                    | December 31, 2016 |
| Otsuka Pharmaceutical Co., Ltd.,       | January 1, 2016                    | December 31, 2016 |
| DAIICHI SANKYO COMPANY, LIMITED.,      | April 1, 2016                      | March 31, 2017    |
| GlaxoSmithKline K.K.,                  | January 1, 2016                    | December 31, 2016 |
| Shionogi & Co., Ltd.,                  | April 1, 2016                      | March 31, 2017    |
| Chugai Pharmaceutical Co., Ltd.,       | January 1, 2016                    | December 31, 2016 |
| Novo Nordisk Pharma Ltd.,              | January 1, 2016                    | December 31, 2016 |
| Astellas Pharma Inc.,                  | April 1, 2016                      | March 31, 2017    |
| Pfizer Japan Inc.,                     | December 1, 2015                   | November 30, 2016 |
| Otsuka Holdings Co.,Ltd.,              | January 1, 2016                    | December 31, 2016 |
| Otsuka Pharmaceutical Factory, Inc.    | January 1, 2016                    | December 31, 2016 |
| EN Otsuka Pharmaceutical Co., Ltd.     | January 1, 2016                    | December 31, 2016 |
| Taisho Toyama Pharmaceutical Co., Ltd. | April 1, 2016                      | March 31, 2017    |
| Biofermin Seiyaku Co., Ltd             | April 1, 2016                      | March 31, 2017    |
| BEE BRAND MEDICO DENTAL CO., LTD.      | April 1, 2016                      | March 31, 2017    |
